# Supplementary material for: Factors associated with release relief of Long COVID symptoms at 12-Months and their impact on daily life
Source: bioRxiv or medRxiv preprint supplement (doi:10.1101/2022.11.18.22282459), 2022-11-18

**Supplementary Materials A. Patient post-COVID-19 condition self-assessment scale**

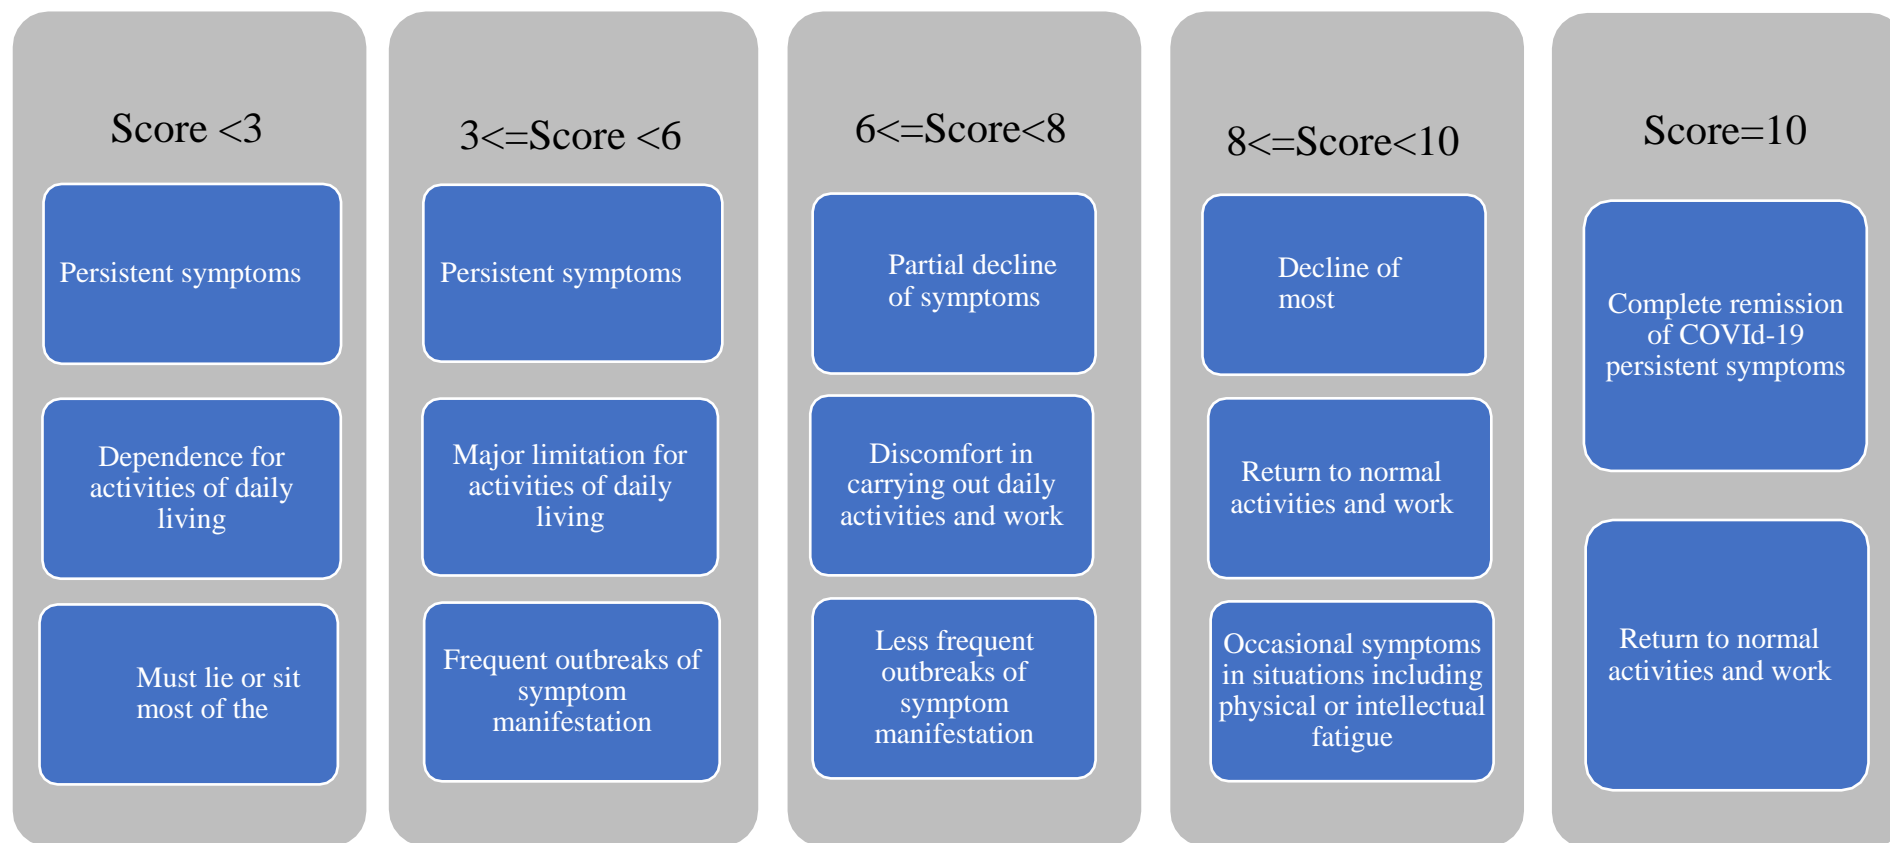

Supplementary Materials B. Study symptom coding

| Study symptom coding                            | Definition of symptoms group                                                                                                         |
|-------------------------------------------------|--------------------------------------------------------------------------------------------------------------------------------------|
| <b>Smell and taste symptoms</b>                 | Aguesia, anosmia                                                                                                                     |
| <b>Other ear-nose-throat symptoms</b>           | Tinnitus, vestibular involvement, odynophagia, rhinorrhea, dysphagia or other otorhinolaryngologic symptoms                          |
| <b>Asthenia</b>                                 | Asthenia or fatigue                                                                                                                  |
| <b>Fevers or Shivering</b>                      | Fevers or shivering                                                                                                                  |
| <b>Cardiothoracic symptoms</b>                  | Dyspnea, cough, thoracic pain and oppression, tachycardia, bradycardia or desaturation                                               |
| <b>Neurological and neurocognitive symptoms</b> |                                                                                                                                      |
| <i>Neurocognitive</i>                           | Concentration and attention disorders (bradypsychia), immediate memory disorders, insomnia/hypersomnia                               |
| <i>Sensory disorders</i>                        | Tingling, burning, neurogenic pain or balance disorders or paresthesia                                                               |
| <i>Other neurological</i>                       | Difficulty swallowing, difficulty articulating, urinary retention, thermoregulation disorders, deafness, dysphonia, thermoregulation |
| <b>Psychic disorders</b>                        | Anxiety, emotionality, thymic disorders, mood disorders                                                                              |
| <b>Digestive symptoms</b>                       | Diarrhea, abdominal pain, constipation, gastroparesis or vomiting/nausea                                                             |
| <b>Musculoskeletal</b>                          | Myalgias, muscle weakness, arthralgias or tenosynovitis                                                                              |
| <b>Cutaneous and vascular symptoms</b>          | Urticaria, eczema, subcutaneous hematoma or vascular inflammation                                                                    |
| <b>Ophthalmic symptoms</b>                      | Dry eyes, cloudy vision, conjunctivitis, orbit pain or visual blurring                                                               |

Supplementary Materials C: Detail of symptoms by class between initial long COVID phase and one year follow-up

| Symptoms                                       | Initial long COVID -19 phase |       |        |         | One year follow-up |       |        |         |
|------------------------------------------------|------------------------------|-------|--------|---------|--------------------|-------|--------|---------|
|                                                | N                            | %     | 95% CI |         | N                  | %     | 95% CI |         |
| Smell and taste                                | 82                           | 35.5% | 29.3%  | - 42.0% | 92                 | 39.8% | 33.5%  | - 46.5% |
| Ageusia                                        | 33                           | 14.3% | 10.0%  | - 19.5% | 63                 | 27.3% | 21.6%  | - 33.5% |
| Anosmia                                        | 79                           | 34.2% | 28.1%  | - 40.7% | 80                 | 34.6% | 28.5%  | - 41.2% |
| Other ear-nose-throat                          | 53                           | 22.9% | 17.7%  | - 28.9% | 146                | 63.2% | 56.6%  | - 69.4% |
| Odynophagia or dysphagia                       | 20                           | 8.7%  | 5.4%   | - 13.1% | 61                 | 26.4% | 20.8%  | - 32.6% |
| Tinnitus or vestibular involvement             | 37                           | 16.0% | 11.5%  | - 21.4% | 99                 | 42.9% | 36.4%  | - 49.5% |
| Rhinorrhea                                     | 13                           | 5.6%  | 3.0%   | - 9.4%  | 54                 | 23.4% | 18.1%  | - 29.4% |
| Asthenia                                       | 178                          | 77.1% | 71.1%  | - 82.3% | 192                | 83.1% | 77.7%  | - 87.7% |
| Fevers or Shivering                            | 39                           | 16.9% | 12.3%  | - 22.3% | 75                 | 32.5% | 26.5%  | - 38.9% |
| Cardiothoracic                                 | 187                          | 81.0% | 75.3%  | - 85.8% | 180                | 77.9% | 72.0%  | - 83.1% |
| Cough                                          | 36                           | 15.6% | 11.2%  | - 20.9% | 54                 | 23.4% | 18.1%  | - 29.4% |
| Thoracic pain, chest tightness and tachycardia | 155                          | 67.1% | 60.6%  | - 73.1% | 117                | 50.6% | 44.0%  | - 57.3% |
| Dyspnea                                        | 132                          | 57.1% | 50.5%  | - 63.6% | 142                | 61.5% | 54.9%  | - 67.8% |
| Other cardiothoracic                           | 7                            | 3.0%  | 1.2%   | - 6.1%  | 38                 | 16.5% | 11.9%  | - 21.9% |
| Neurological and neurocognitive                | 193                          | 83.5% | 78.1%  | - 88.1% | 212                | 91.8% | 87.5%  | - 95.0% |
| Neurocognitive                                 | 132                          | 57.1% | 50.5%  | - 63.6% | 174                | 75.3% | 69.2%  | - 80.7% |
| Sensory disorders                              | 142                          | 61.5% | 54.9%  | - 67.8% | 190                | 82.3% | 76.7%  | - 87.0% |
| Other neurological                             | 50                           | 21.6% | 16.5%  | - 27.5% | 91                 | 39.4% | 33.0%  | - 46.0% |
| Psychic                                        | 36                           | 18.7% | 13.4%  | - 24.9% | 158                | 68.4% | 62.0%  | - 74.3% |
| Digestive                                      | 93                           | 40.3% | 33.9%  | - 46.9% | 124                | 53.7% | 47.0%  | - 60.2% |
| Diarrhea                                       | 56                           | 24.2% | 18.9%  | - 30.3% | 48                 | 20.8% | 15.7%  | - 26.6% |
| Vomiting/Nausea                                | 26                           | 11.3% | 7.5%   | - 16.1% | 47                 | 20.3% | 15.3%  | - 26.1% |
| Other digestive                                | 50                           | 21.6% | 16.5%  | - 27.5% | 104                | 45.0% | 38.5%  | - 51.7% |
| Musculoskeletal                                | 93                           | 40.3% | 33.9%  | - 46.9% | 182                | 78.8% | 72.9%  | - 83.9% |
| Myalgias or muscle weakness                    | 69                           | 29.9% | 24.0%  | - 36.2% | 122                | 52.8% | 46.2%  | - 59.4% |
| Arthralgias or tenosynovitis                   | 51                           | 22.1% | 16.9%  | - 28.0% | 182                | 78.8% | 72.9%  | - 83.9% |
| Cutaneous and vascular                         | 72                           | 31.2% | 25.3%  | - 37.6% | 142                | 61.5% | 54.9%  | - 67.8% |
| Urticaria or eczema                            | 32                           | 13.9% | 9.7%   | - 19.0% | 60                 | 26.0% | 20.4%  | - 32.1% |
| Subcutaneous hematoma or vascular inflammation | 44                           | 19.0% | 14.2%  | - 24.7% | 82                 | 35.5% | 29.3%  | - 42.0% |
| Other cutaneous                                | 29                           | 12.6% | 8.6%   | - 17.5% | 90                 | 39.0% | 32.6%  | - 45.6% |
| Ophthalmic                                     | 48                           | 20.8% | 15.7%  | - 26.6% | 103                | 44.6% | 38.1%  | - 51.2% |

Supplementary D: Cumulative percentage of participants reporting symptom remission at one year

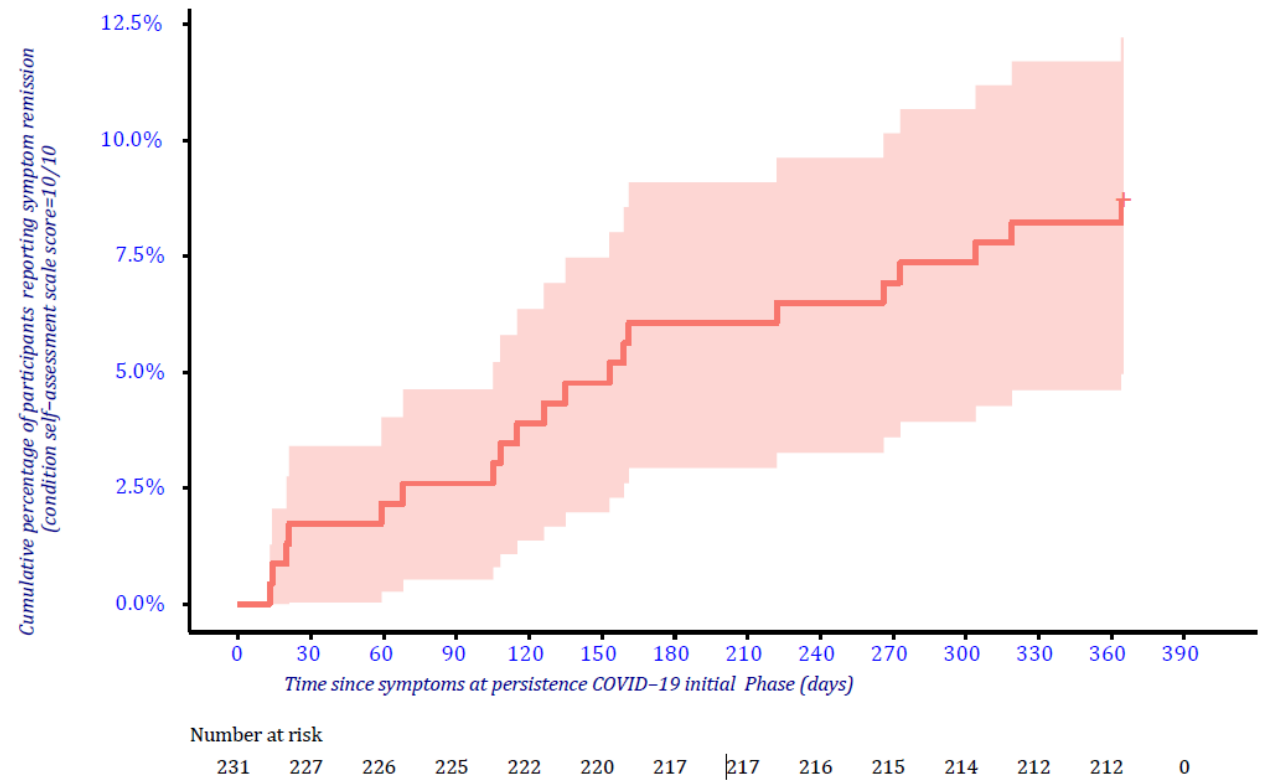

Supplement: Supplementary file [file media-1.pdf]
